# Supplementary material for: Understanding patterns of fatigue in health and disease: protocol for an ecological momentary assessment study using digital technologies
Source: HighWire-hosted journal article supplement (doi:10.1136/bmjopen-2023-081416), 2024-05-01
Supplement: bmjopen-2023-081416supp002_data_supplement.pdf [file bmjopen-2023-081416supp002_data_supplement.pdf]

## Supplementary data file 2: Selecting technologies for the study

### Selection of the technologies and platforms considered as part of the procurement process

- Philips health band  
<https://www.usa.philips.com/healthcare/product/HC422210064081/philips-health-band#specifications>
- Philips Actiwatch 2
- M-Path <https://m-path.io/landing/>
- PRO Diary CamNtech [PRO-Diary - CamNtech](#)
- LifeData experience platform [LifeData Experience Sampling App - LifeData Experience Sampling App for Research \(lifedatacorp.com\)](#)
- MediBiosense ECG patch technology:
- Movisens EcgMove4, Move 4, SensorTrigger, EdaMove 4, LKightMove4 [Products - movisens GmbH](#)

### Key factors that were considered when choosing technologies to capture project data

- Range of data parameters that can be captured or measured
- Study team experience and knowledge of the technology and successful deployment in other projects
- Cost
- Support infrastructure for technical problems
- Ease of data download/supports data flow within the trial, maintaining privacy and security
- GDPR compliance
- Accuracy (e.g. consensus that wrist-worn heart rate monitoring lacked the accuracy required for our study)
- Ease of use/setting up for end user/requirement for participant internet connectivity for successful deployment
- Ability to interact with raw data from devices/apply and test different algorithms to raw data
